# Supplementary material for: Spatiotemporal and cross-scale interactions in hydroclimate variability: a case-study in France
Source: Copernicus journal article supplement (doi:10.5194/hess-25-5683-2021), 2021-11-04
Supplement: Supplementary file [file hess-25-5683-2021-supplement-title-page.pdf › hess-25-5683-2021-supplement-title-page.pdf]

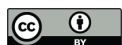

*Supplement of*

## **Spatiotemporal and cross-scale interactions in hydroclimate variability: a case-study in France**

**Manuel Fossa et al.**

*Correspondence to:* Manuel Fossa ([manuel.fossa1@univ-rouen.fr](mailto:manuel.fossa1@univ-rouen.fr))

- [hess-25-5683-2021-supplement-title-page.pdf](#)
- [a1.png](#)
- [a10.png](#)
- [a11.png](#)
- [a12.png](#)
- [a2.png](#)
- [a3.png](#)
- [a4.png](#)
- [a5.png](#)
- [a6.png](#)
- [a7.png](#)
- [a8.png](#)
- [a9.png](#)

The copyright of individual parts of the supplement might differ from the article licence.
